# Supplementary material
Source: PubMed Central journal article supplement (PMC2929837)
Supplement: NIHMS228148-supplement-Figures_Tables_and_text.pdf [file NIHMS228148-supplement-Figures_Tables_and_text.pdf]

# Supplemental Figure 1

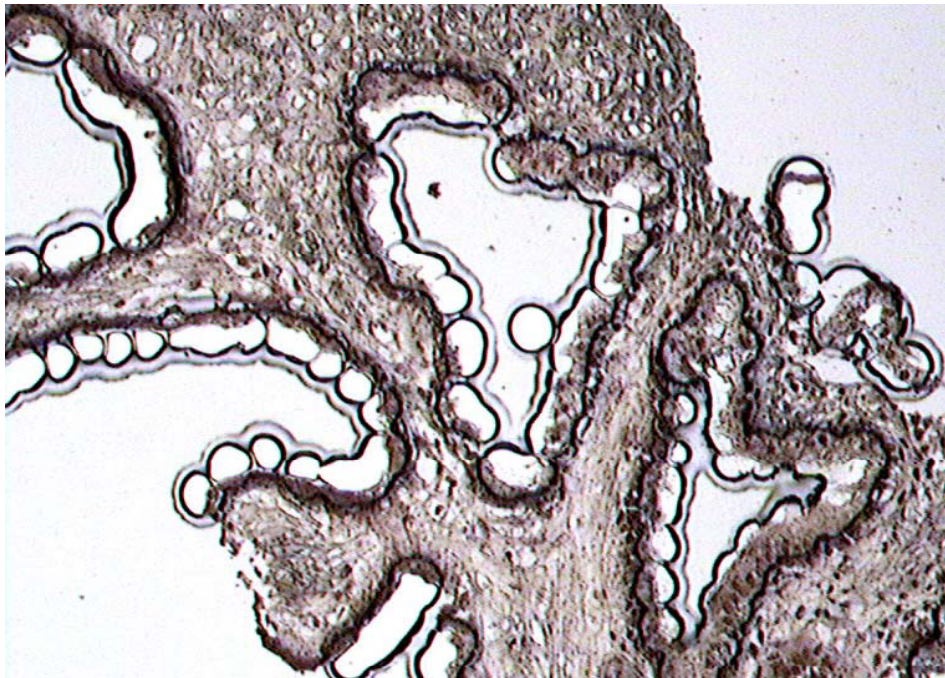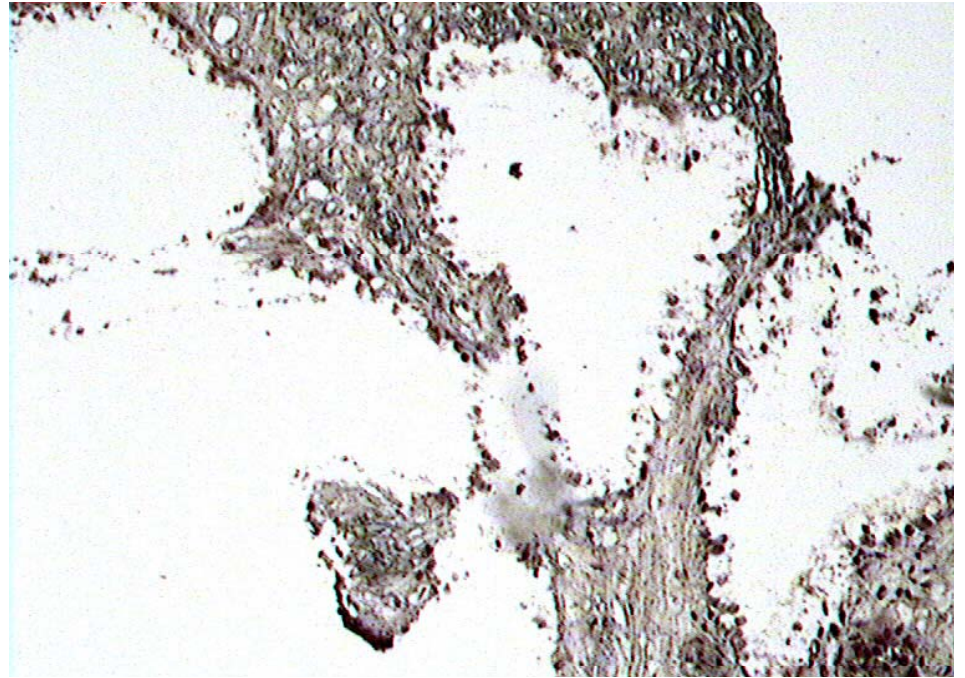

# Supplemental Figure 2

## Cancer/Benign Ratios

457 genes  
up-regulated  
q-value <0.01%

497 genes  
down-regulated  
q-value <0.01%

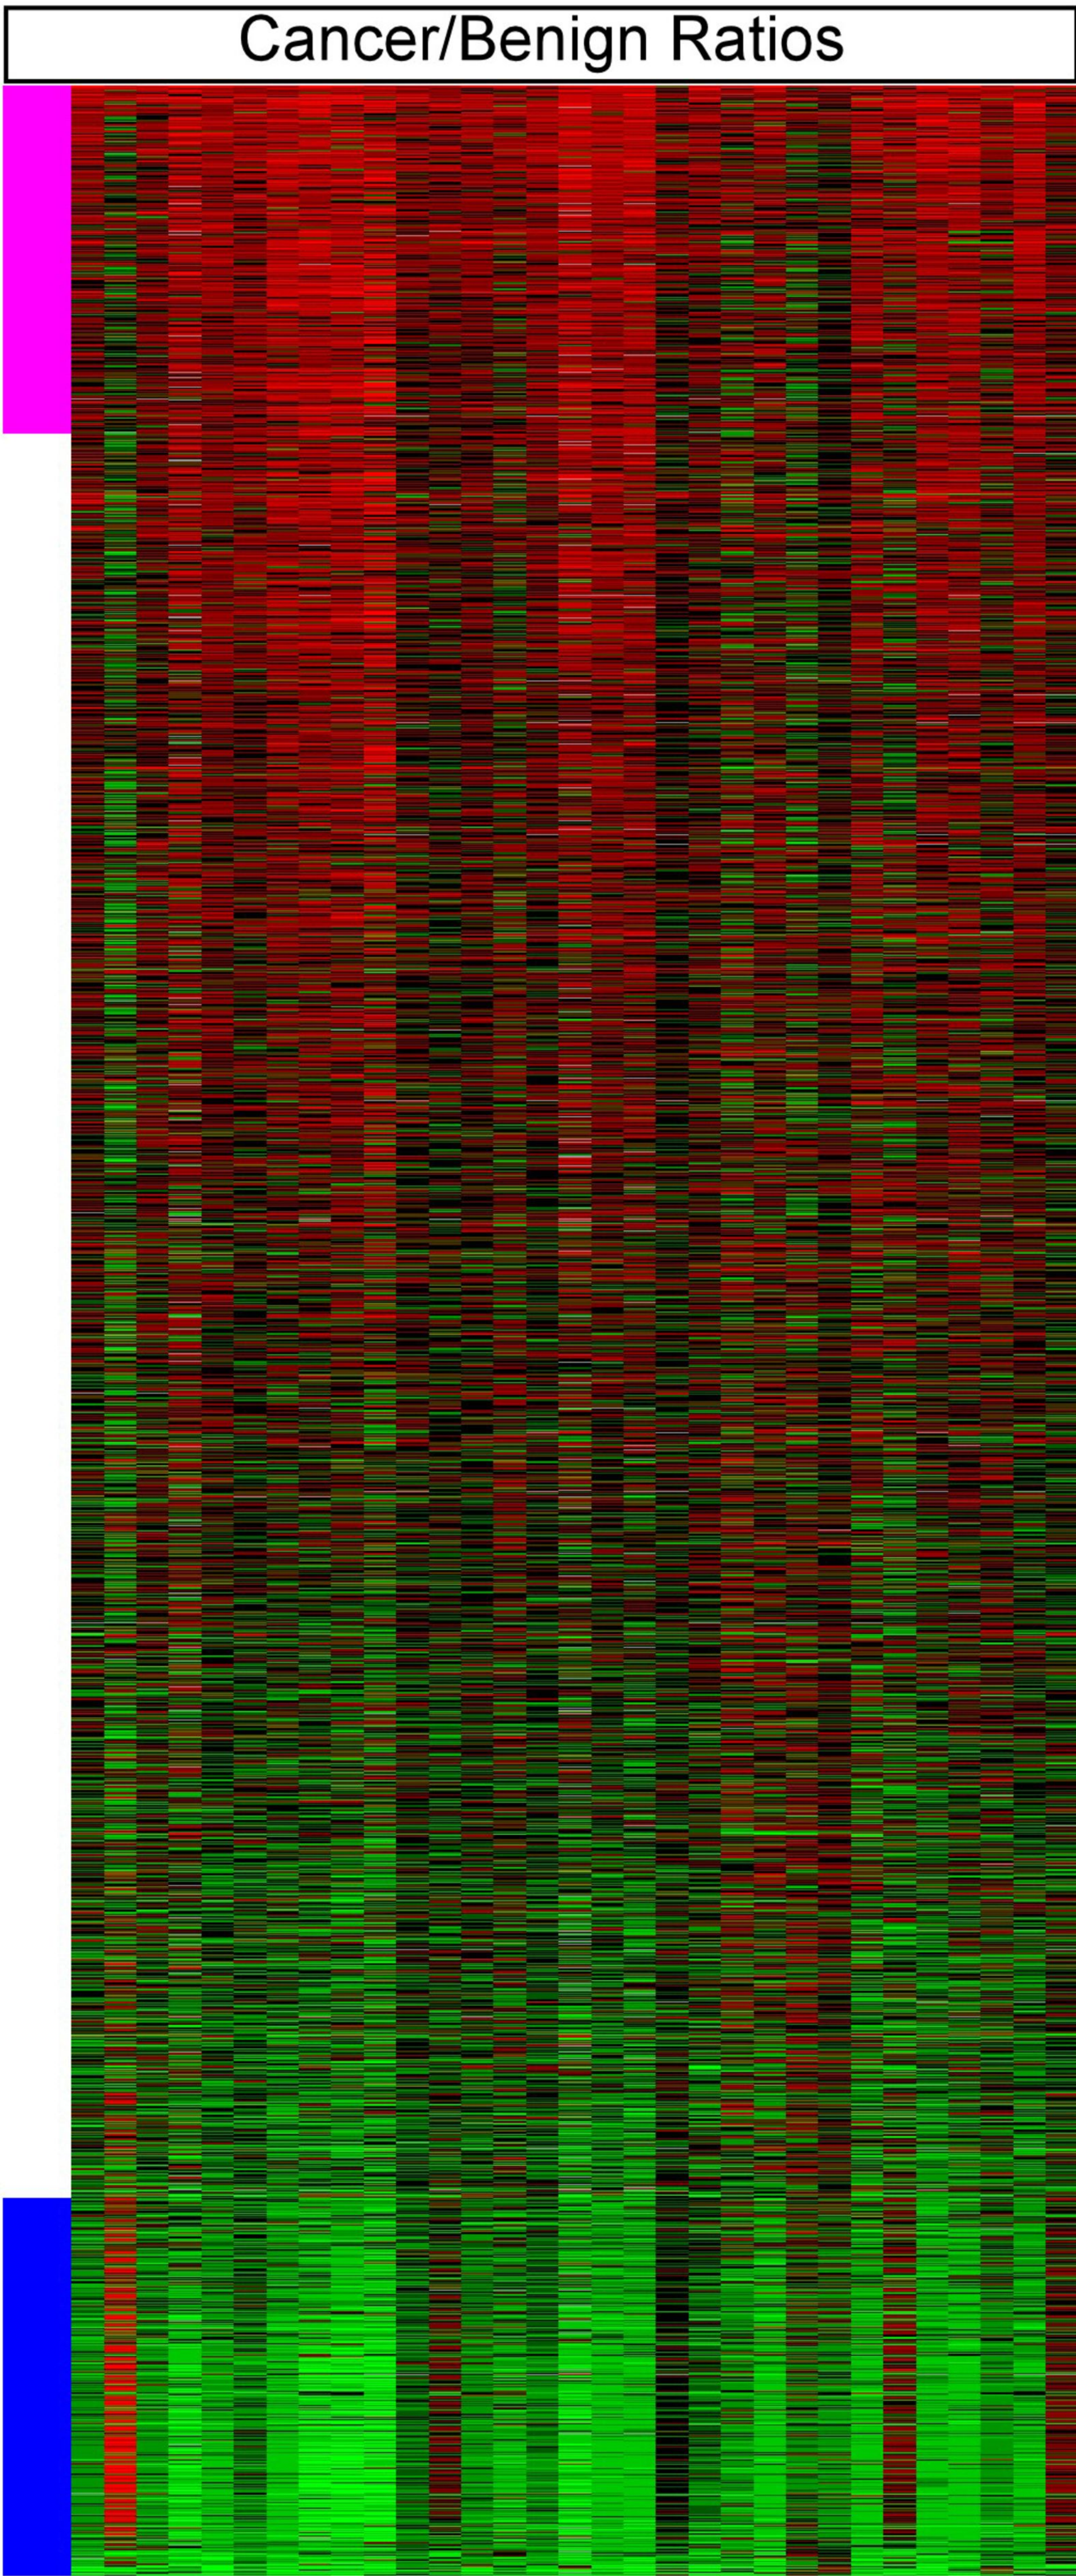

# Supplemental Figure 3

A.

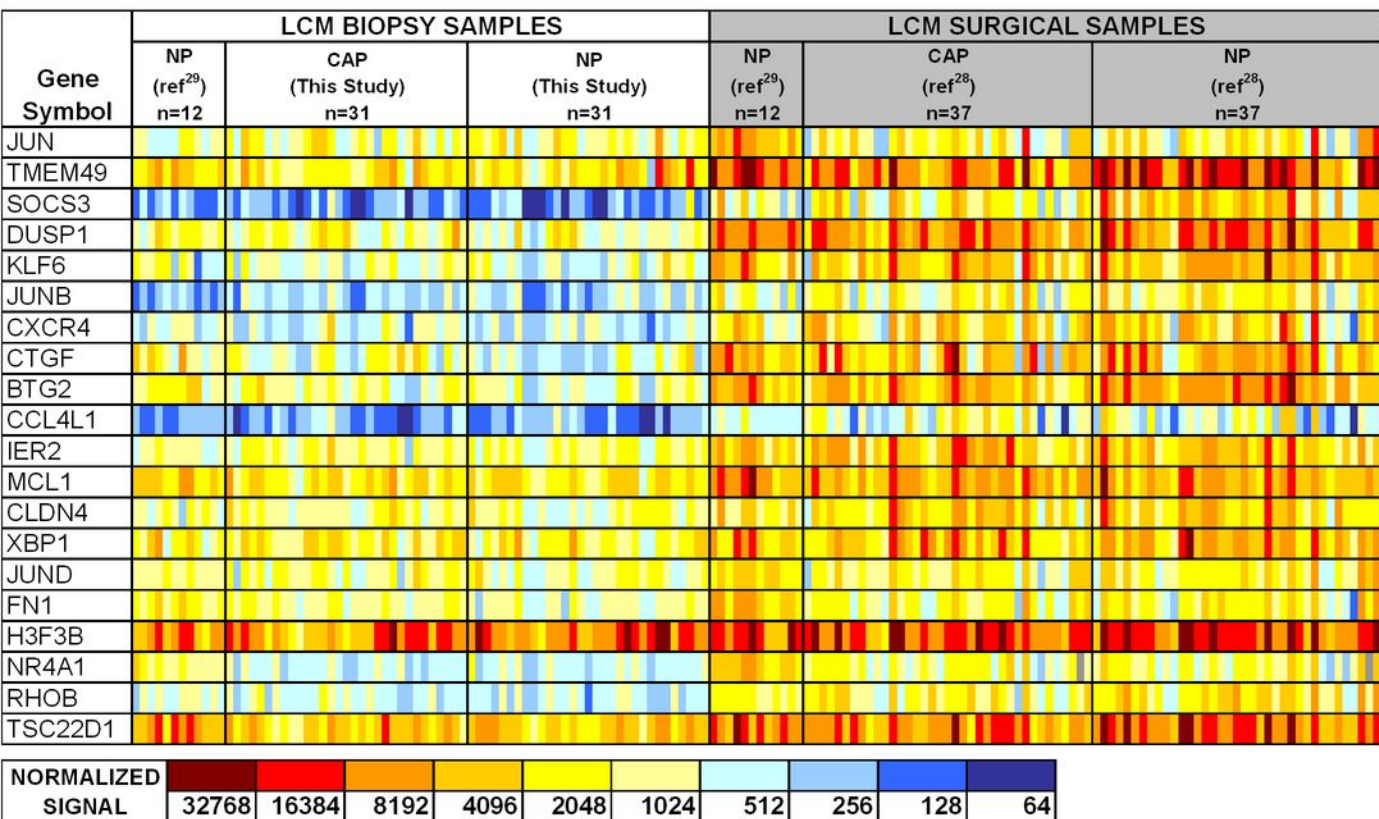

B.

|         |                               | BIOPSY                       |                       |                      | SURGERY                      |                               |                              |
|---------|-------------------------------|------------------------------|-----------------------|----------------------|------------------------------|-------------------------------|------------------------------|
|         |                               | NP (ref <sup>29</sup> ) n=12 | CAP (This Study) n=31 | NP (This Study) n=31 | NP (ref <sup>29</sup> ) n=12 | CAP (ref <sup>28</sup> ) n=37 | NP (ref <sup>28</sup> ) n=37 |
| BIOPSY  | NP (ref <sup>29</sup> ) n=12  |                              | 7.16E-01              | 5.41E-01             | 2.73E-04                     | 1.56E-03                      | 2.67E-04                     |
|         | CAP (This Study) n=31         | 7.16E-01                     |                       | 7.82E-01             | 4.63E-05                     | 2.66E-04                      | 4.28E-05                     |
|         | NP (This Study) n=31          | 5.41E-01                     | 7.82E-01              |                      | 3.79E-05                     | 2.07E-04                      | 3.55E-05                     |
| SURGERY | NP (ref <sup>29</sup> ) n=12  | 2.73E-04                     | 4.63E-05              | 3.79E-05             |                              | 3.57E-01                      | 9.32E-01                     |
|         | CAP (ref <sup>28</sup> ) n=37 | 1.56E-03                     | 2.66E-04              | 2.07E-04             | 3.57E-01                     |                               | 3.92E-01                     |
|         | NP (ref <sup>28</sup> ) n=37  | 2.67E-04                     | 4.28E-05              | 3.55E-05             | 9.32E-01                     | 3.92E-01                      |                              |

# Supplemental Figure 4

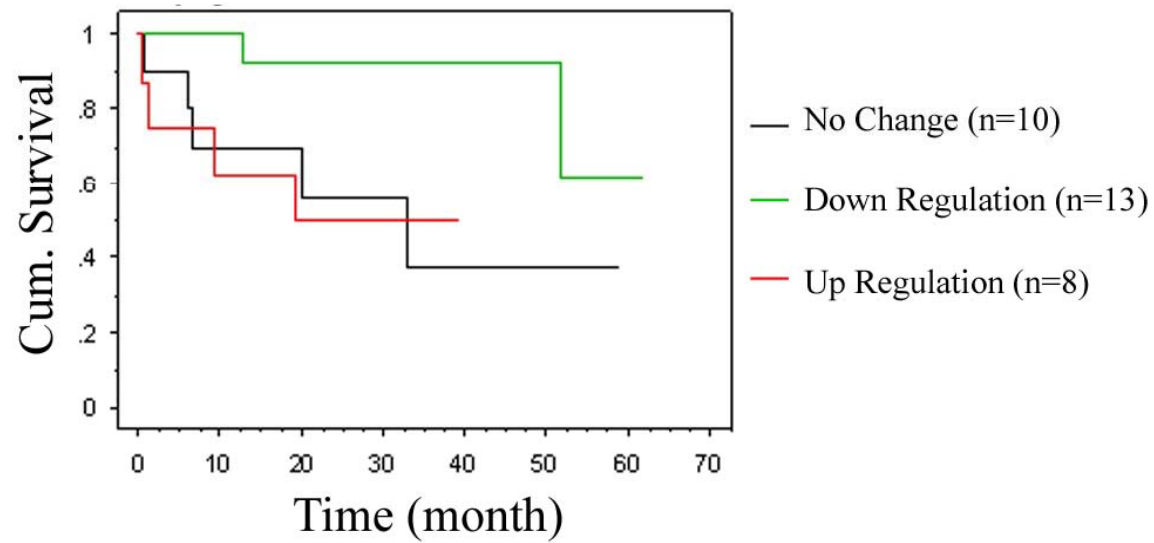

## Figure Legends

Supplemental Figure 1. Frozen section of prostate needle biopsy after laser pulsing of benign luminal epithelial cells before (a) and after (b) removal of the cells from the section for RNA extraction. The refractile circles (a) show the sites that the 5 micron diameter laser beam targeted the cells.

Supplemental Figure 2. cDNA microarray gene expression analysis from prostate needle biopsies. Normal and neoplastic epithelium was microdissected individually from needle core biopsies from 31 patients. Following 2 rounds of linear amplification, transcript levels were measured by microarray hybridization. A total of 5910 genes were tested. The heatmap of differentially expressed genes (cancer *vs.* benign) is shown. 457 genes were upregulated, and 497 genes were downregulated,  $q$ -values  $< 0.01\%$ . Red: upregulated in tumor; Green: downregulated in tumor. Row: genes; Column: patients.

Supplemental Figure 3. Comparison of expression levels of ischemia-associated genes identified in Lin, et al. (29) in biopsy and surgical samples. A. Heatmap of expression levels of samples from three different studies. Expression levels are denoted by colors corresponding to signal intensity. Most genes are consistently upregulated in radical prostatectomy samples relative to needle biopsy samples. B. T-tests between groups demonstrate insignificant differences overall comparing only needle biopsy samples, or only surgical samples, and significant differences between needle biopsy samples and surgical samples.

Supplemental Figure 4. The correlation between each patient's pretreatment androgen receptor (AR) mRNA and his biochemical relapse (serum PSA) was analyzed by Kaplan-Meier Plot. No change: there was not any difference in AR mRNA level between benign and cancer epithelium. Downregulation: the patient's benign AR mRNA was 2 fold less than cancer AR. Upregulation: the patient's benign AR mRNA was 2 fold more than cancer AR. X-axis: time to biochemical relapse, Y-axis: % of relapse free survival.

Supplementary Table S1. Patient characteristics prior to therapy

|                                     |          |
|-------------------------------------|----------|
| Number                              | 57       |
| Age                                 |          |
| Median                              | 63       |
| Range                               | 49-74    |
| ECOG PS                             |          |
| 0                                   | 52       |
| 1                                   | 3        |
| PSA                                 |          |
| Median                              | 12.2     |
| Range                               | 1.4-58.6 |
| Clinical Stage (AJCC 2002 criteria) |          |
| T1c                                 | 7        |
| T2a                                 | 7        |
| T2b                                 | 10       |
| T2c                                 | 19       |
| T3a                                 | 11       |
| T3b                                 | 2        |
| T4                                  | 1        |
| Biopsy Gleason Score                |          |
| 6                                   | 5        |
| 7                                   | 22       |
| 8                                   | 17       |
| 9                                   | 12       |
| 10                                  | 1        |

Supplementary Table S2. Clinical data characteristics of patient samples on microarrays (n=31)

| ID      | Age | Clinical Stage | Surgical margin status | Nodal status at surgery | Gleason Sum Score |          |     | Censored for progression (PSA > 0.4) | Time (months) to progression (PSA > 0.4) |
|---------|-----|----------------|------------------------|-------------------------|-------------------|----------|-----|--------------------------------------|------------------------------------------|
|         |     |                |                        |                         | Biopsy            | Surgical | LCM |                                      |                                          |
| 6082-02 | 62  | T2b            | Negative               | Positive                | 8                 | 9        | 4+4 | 0                                    | 6.8                                      |
| 6082-03 | 66  | T3a            | Negative               | Positive                | 7                 | 7        | 3+3 | 0                                    | 15.4                                     |
| 6082-04 | 69  | T3a            | Positive               | Negative                | 6                 | 7        | 3+3 | 1                                    | 39.2                                     |
| 6082-07 | 69  | T3a            | Negative               | Negative                | 7                 | 7        | 3+4 | 1                                    | 35.5                                     |
| 6082-08 | 59  | T2c            | Negative               | Negative                | 7                 | 6        | 3+3 | 1                                    | 38.8                                     |
| 6082-10 | 66  | T1c            | Negative               | Negative                | 8                 | 6        | 3+3 | 1                                    | 36.0                                     |
| 6082-13 | 74  | T2b            | Negative               | Negative                | 8                 | 8        | 3+3 | 0                                    | 13.6                                     |
| 6082-14 | 72  | T2a            | Negative               | Negative                | 9                 | 8        | 4+3 | 1                                    | 32.5                                     |
| 6082-15 | 52  | T2a            | Positive               | Negative                | 6                 | 7        | 3+3 | 1                                    | 16.6                                     |
| 6082-16 | 65  | T2a            | Negative               | Negative                | 8                 | 7        | 3+4 | 1                                    | 30.0                                     |
| 6082-19 | 52  | T3a            | Negative               | Negative                | 7                 | 7        | 3+3 | 1                                    | 24.1                                     |
| 6082-22 | 59  | T3a            | Negative               | Negative                | 7                 | 7        | 3+3 | 1                                    | 24.1                                     |
| 6082-23 | 56  | T3a            | Negative               | Negative                | 7                 | 8        | 3+3 | 1                                    | 22.9                                     |
| 6082-24 | 69  | T2a            | Positive               | Negative                | 8                 | 8        | 4+4 | 1                                    | 23.5                                     |
| 6082-25 | 63  | T1c            | Negative               | Negative                | 9                 | 7        | 3+3 | 0                                    | 6.4                                      |
| 6082-28 | 63  | T2b            | Positive               | Negative                | 9                 | 7        | 3+4 | 1                                    | 23.2                                     |
| 6082-31 | 57  | T2c            | Negative               | Negative                | 7                 | 7        | 3+3 | 1                                    | 19.7                                     |
| 6082-32 | 65  | T2c            | Negative               | Negative                | 8                 | 6        | 3+3 | 1                                    | 11.6                                     |
| 6082-34 | 66  | T2c            | Negative               | Negative                | 9                 | 9        | 4+4 | 0                                    | 0.7                                      |
| 6082-36 | 63  | T2c            | Positive               | Positive                | 8                 | 9        | 3+4 | 1                                    | 6.3                                      |
| KP-01   | 56  | T2c            | Negative               | Negative                | 7                 | 6        | 4+4 | 1                                    | 13.0                                     |
| KP-02   | 62  | T3b            | Negative               | Negative                | 7                 | 7        | 4+4 | 1                                    | 6.4                                      |
| KP-03   | 56  | T2b            | Negative               | Negative                | 7                 | 7        | 3+3 | 1                                    | 7.5                                      |
| KP-04   | 71  | T1c            | Positive               | Negative                | 7                 | 7        | 3+3 | 1                                    | 4.8                                      |
| KP-05   | 68  | T2b            | Positive               | Negative                | 10                | 10       | 4+5 | 1                                    | 2.8                                      |
| UW-01   | 60  | T2c            | Positive               | Positive                | 7                 | 7        | 4+4 | 0                                    | 1.4                                      |
| UW-03   | 54  | T2c            | Positive               | Positive                | 9                 | 9        | 4+4 | 0                                    | 0.6                                      |
| UW-05   | 64  | T2c            | Negative               | Negative                | 8                 | 7        | 4+3 | 1                                    | 20.1                                     |
| UW-09   | 59  | T3b            | Negative               | Positive                | 7                 | NA       | 4+4 | 0                                    | 10.1                                     |
| UW-10   | 58  | T2b            | Negative               | Negative                | 7                 | 8        | 3+4 | 1                                    | 10.4                                     |
| UW-11   | 63  | T2c            | Negative               | Negative                | 7                 | 8        | 3+3 | 1                                    | 9.8                                      |



Supplementary Table S3. Comparison of gene expression changes differentiating neoplastic from normal prostate epithelium across four different microarray data sets.

| This Study*            | True et al, <sup>28</sup> 2006 | Lapointe et al, <sup>15</sup> 2004 | Glinsky et al, <sup>y</sup> 2004 |
|------------------------|--------------------------------|------------------------------------|----------------------------------|
| top 1%<br>(21 genes)   | top 1% 10 (48%)                | top 1% 7 (33%)                     | top 1% 4 (19%)                   |
|                        | top 5% 17 (81%)                | top 5% 12 (57%)                    | top 5% 10 (48%)                  |
|                        | top 10% 19 (90%)               | top 10% 15 (71%)                   | top 10% 13 (62%)                 |
| top 5%<br>(107 genes)  | top 1% 13 (12%)                | top 1% 9 (8%)                      | top 1% 8 (7%)                    |
|                        | top 5% 36 (34%)                | top 5% 23 (21%)                    | top 5% 19 (18%)                  |
|                        | top 10% 57 (53%)               | top 10% 35 (33%)                   | top 10% 34 (32%)                 |
| top 10%<br>(214 genes) | top 1% 14 (7%)                 | top 1% 14 (7%)                     | top 1% 8 (4%)                    |
|                        | top 5% 50 (23%)                | top 5% 36 (17%)                    | top 5% 29 (14%)                  |
|                        | top 10% 81 (38%)               | top 10% 56 (26%)                   | top 10% 54 (25%)                 |

\*Top unique genes (among the 2140 common to all four datasets) identified in this study between normal epithelium and cancer as ranked by SAM t-test score(d).
